# Supplementary material for: Down-regulation of HPGD by miR-146b-3p promotes cervical cancer cell proliferation, migration and anchorage-independent growth through activation of STAT3 and AKT pathways
Source: PubMed Central journal article supplement (PMC6192999; doi:10.1038/s41419-018-1059-y), 2018-10-17
Supplement: 41419_2018_1059_MOESM1_ESM.pdf [file 41419_2018_1059_MOESM1_ESM.pdf]

**A**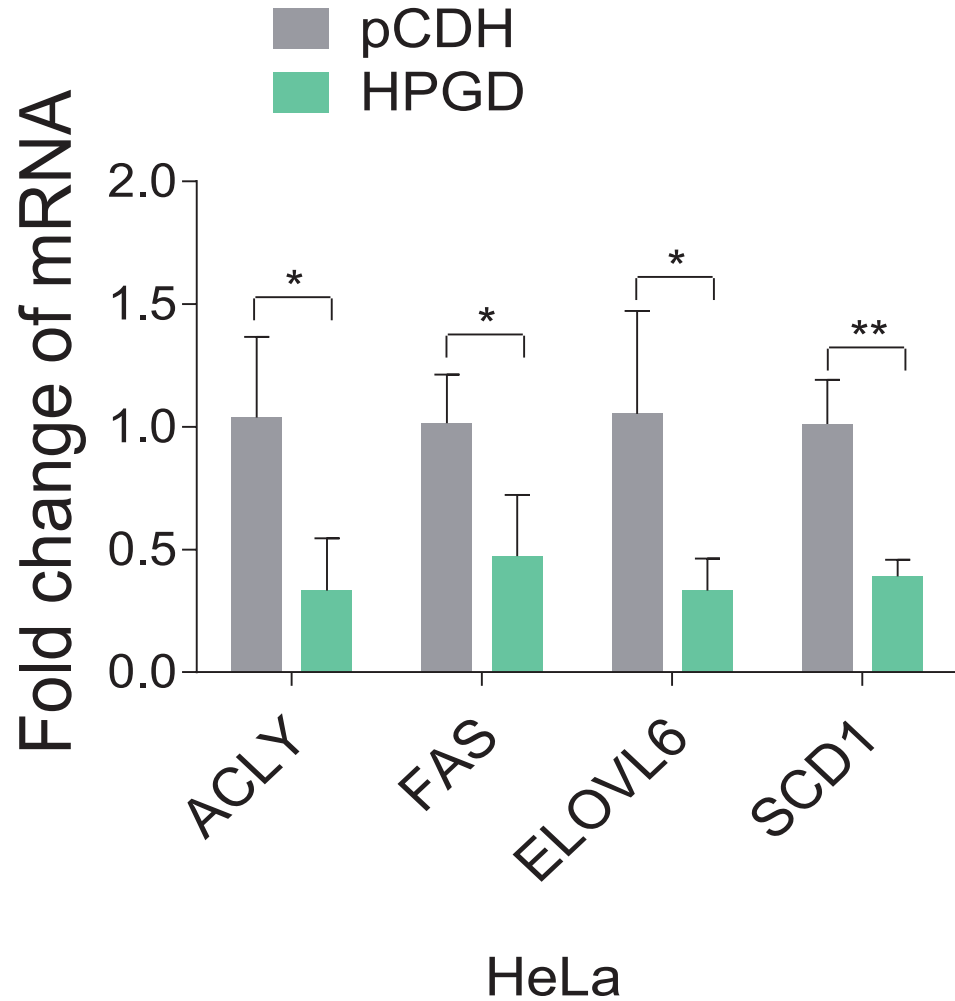**B**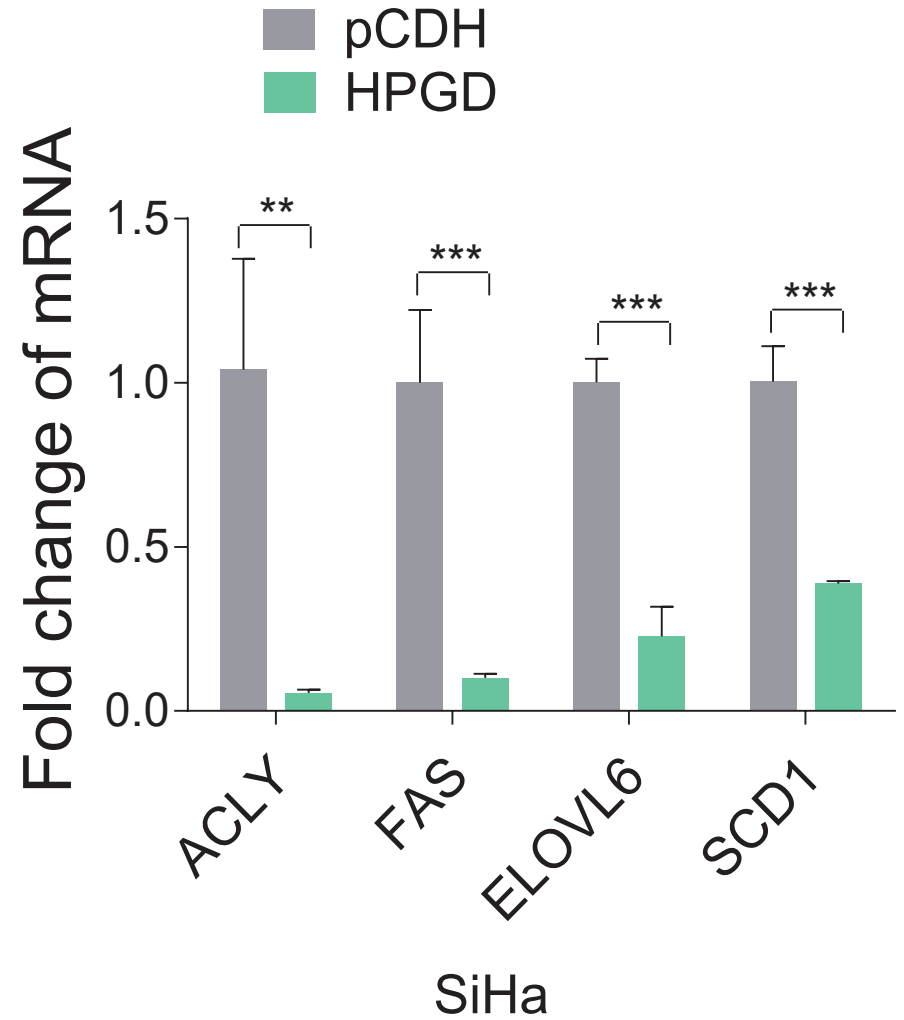

Supplementary Figure 1
